# Supplementary material for: Assessment of Hungarian Consumers’ Exposure to Pesticide Residues Based on the Results of Pesticide Residue Monitoring between 2017 and 2021
Source: MDPI journal article supplement (doi:10.3390/agrochemicals2030026), 2023-09-11
Supplement: s1 [file s1]

# Assessment of Hungarian Consumers' Exposure to Pesticide Residues Based on the Results of Pesticide Residue Monitoring between 2017 and 2021

Árpád Ambrus <sup>1\*</sup>, Júlia Szenczi-Cseh <sup>2</sup>, Lajos Bíró <sup>3</sup>, Adrienn Vásárhelyi <sup>4</sup> and Henriett Szemánné Dobrik <sup>5</sup>

## Supplementary materials

**Table S1.** Gender and age distributions of the participants of the two surveys.

| Age (year) | Gender | 2009 | 2018-2020 |
|------------|--------|------|-----------|
| 0-1        | Male   | 18   | -         |
|            | Female | 60   | -         |
| 1-2        | Male   | 46   | 134       |
|            | Female | 86   | 134       |
| 2-3        | Male   | 73   | 131       |
|            | Female | 65   | 128       |
| 3-9        | Male   | 420  | 237       |
|            | Female | 396  | 233       |
| 9-18       | Male   | 800  | 288       |
|            | Female | 838  | 292       |
| 18-64      | Male   | 4946 | 256       |
|            | Female | 5001 | 255       |
| 64-74      | Male   | 600  | 257       |
|            | Female | 627  | 257       |
| >74        | Male   | 447  | -         |
|            | Female | 552  | -         |

Note: The age ranges were calculated as: 0-1: babies up to one year, excluding those who had their birthdays on the survey day; the other age groups were defined similarly.

**Table S2.** Summary of consumption survey 2009.

| Age [year]           | 0-1   | 1-2   | 2-3   | 3-9   | 9-18  | 18-64 | 64-74 | >74 (101) |
|----------------------|-------|-------|-------|-------|-------|-------|-------|-----------|
| No. of subjects      | 78    | 132   | 138   | 816   | 1638  | 9947  | 1227  | 999       |
| Ave bw [kg]          | 8.16  | 12.11 | 14.39 | 24.80 | 51.67 | 75.32 | 77.26 | 70.72     |
| <b>Apples</b>        |       |       |       |       |       |       |       |           |
| Consum [day]         | 32    | 47    | 65    | 311   | 551   | 2859  | 471   | 384       |
| LP [kg]              | 0.330 | 0.322 | 0.225 | 0.383 | 0.379 | 0.481 | 0.391 | 0.357     |
| Max <sup>1</sup>     | 54.55 | 27.27 | 16.67 | 32.14 | 14.29 | 16.13 | 1.00  | 8.57      |
| P97.5 <sup>2</sup>   | 40.45 | 26.59 | 15.63 | 15.43 | 7.33  | 6.38  | 5.07  | 5.05      |
| Average <sup>3</sup> | 15.11 | 10.65 | 8.50  | 6.32  | 3.42  | 2.56  | 2.34  | 2.50      |
| Median <sup>4</sup>  | 11.44 | 9.89  | 9.38  | 5.91  | 3.13  | 2.21  | 2.00  | 2.24      |
| SD <sup>5</sup>      | 10.06 | 6.01  | 3.79  | 3.78  | 1.76  | 1.56  | 1.20  | 1.20      |
| CV <sup>6</sup>      | 0.67  | 0.56  | 0.45  | 0.60  | 0.51  | 0.61  | 0.51  | 0.48      |
| <b>Cherries</b>      |       |       |       |       |       |       |       |           |
| Consum [day]         | 2     | 4     | 9     | 71    | 104   | 670   | 119   | 77        |
| LP [kg]              | 0.04  | 0.10  | 0.14  | 0.65  | 1.58  | 2.32  | 1.02  | 0.55      |
| Max <sup>1</sup>     | 4.55  | 8.33  | 9.41  | 26.09 | 30.59 | 30.77 | 13.16 | 7.71      |
| P97.5 <sup>2</sup>   | NA    | NA    | NA    | 17.93 | 9.24  | 7.73  | 8.33  | 5.41      |
| Average <sup>3</sup> | 3.27  | 6.76  | 4.58  | 5.16  | 3.15  | 2.44  | 2.42  | 2.02      |
| Median <sup>4</sup>  | 3.27  | 6.86  | 4.55  | 3.64  | 2.34  | 1.88  | 1.86  | 1.97      |
| SD <sup>5</sup>      | 1.80  | 1.82  | 4.55  | 4.92  | 3.57  | 2.44  | 2.32  | 1.39      |
| CV <sup>6</sup>      | 0.55  | 0.27  | 0.99  | 0.95  | 1.13  | 1.00  | 0.96  | 0.69      |
| <b>Grapes</b>        |       |       |       |       |       |       |       |           |
| Consum [day]         | 2     | 0     | 0     | 2     | 3     | 25    | 4     | 7         |
| LP [kg]              | 0.05  |       |       | 0.07  | 0.28  | 0.30  | 0.47  | 0.22      |
| Max <sup>1</sup>     | 6.25  |       |       | 2.86  | 5.36  | 3.92  | 6.03  | 3.08      |
| P97.5 <sup>2</sup>   |       |       |       |       |       |       |       |           |
| Average <sup>3</sup> |       |       |       |       |       | 2.00  |       |           |
| Median <sup>4</sup>  |       |       |       |       |       | 1.85  |       |           |
| SD <sup>5</sup>      |       |       |       |       |       | 0.87  |       |           |
| CV <sup>6</sup>      |       |       |       |       |       | 0.44  |       |           |

| <b>Peaches</b>       |       |       |       |       |       |       |      |       |
|----------------------|-------|-------|-------|-------|-------|-------|------|-------|
| Consum [day]         | 7     | 5     | 1     | 15    | 24    | 178   | 18   | 32    |
| LP [kg]              | 0.13  | 0.17  | 0.29  | 0.62  | 1.11  | 0.83  | 0.64 | 0.64  |
| Max <sup>1</sup>     | 16.00 | 13.64 | 20.00 | 25.00 | 21.43 | 20.00 | 8.33 | 10.71 |
| P97.5 <sup>2</sup>   | NA    | NA    | NA    | NA    | NA    | 11.03 | NA   | 9.05  |
| Average <sup>3</sup> | 11.06 | 11.19 | 20.00 | 9.04  | 5.55  | 4.11  | 4.01 | 4.46  |
| Median <sup>4</sup>  | 13.64 | 10.91 | 20.00 | 7.50  | 4.38  | 3.64  | 3.37 | 3.75  |
| SD <sup>5</sup>      | 4.04  | 1.52  | -     | 5.81  | 4.45  | 2.83  | 2.04 | 2.48  |
| CV <sup>6</sup>      | 0.37  | 0.14  |       | 0.64  | 0.80  | 0.69  | 0.51 | 0.56  |
| <b>Peppers</b>       |       |       |       |       |       |       |      |       |
| Consum [day]         | 3     | 13    | 20    | 146   | 302   | 2406  | 310  | 194   |
| LP [kg]              | 0.01  | 0.12  | 0.11  | 0.16  | 0.22  | 0.27  | 0.32 | 0.20  |
| Max <sup>1</sup>     | 1.5   | 10    | 7.69  | 11.6  | 7.14  | 6.15  | 5.56 | 3.58  |
| P97.5 <sup>2</sup>   | NA    | 9.53  | 7.54  | 6.32  | 4.19  | 3.53  | 4.09 | 2.86  |
| Average <sup>3</sup> | 0.90  | 2.51  | 2.01  | 1.69  | 1.08  | 0.95  | 0.94 | 0.66  |
| Median <sup>4</sup>  | 0.63  | 1.36  | 1.05  | 1.00  | 0.57  | 0.64  | 0.63 | 0.36  |
| SD <sup>5</sup>      | 0.52  | 2.82  | 2.23  | 1.90  | 1.22  | 0.91  | 0.97 | 0.67  |
| CV <sup>6</sup>      | 0.59  | 1.12  | 1.11  | 1.13  | 1.13  | 0.96  | 1.04 | 1.02  |
| <b>Strawberries</b>  |       |       |       |       |       |       |      |       |
| Consum [day]         | 1     | 0     | 3     | 26    | 40    | 212   | 27   | 27    |
| LP [kg]              | 0.04  |       | 0.06  | 1.08  | 0.50  | 0.54  | 0.35 | 0.22  |
| Max <sup>1</sup>     | 5.00  |       | 3.85  | 43.48 | 9.68  | 10.00 | 4.55 | 3.17  |
| P97.5 <sup>2</sup>   |       |       |       |       |       | 7.22  |      |       |
| Average <sup>3</sup> |       |       |       | 6.17  | 2.82  | 2.08  | 1.68 | 1.49  |
| Median <sup>4</sup>  |       |       |       | 3.92  | 2.23  | 1.63  | 1.59 | 1.67  |
| SD <sup>5</sup>      |       |       |       | 8.65  | 2.42  | 1.92  | 1.96 | 0.96  |
| CV <sup>6</sup>      |       |       |       | 1.40  | 0.86  | 0.92  | 1.17 | 0.64  |

Notes:

<sup>1</sup>: Maximum amount consumed [g/kgbw/day]

<sup>2</sup>: 97.5th percentile consumption [g/kgbw/day]

<sup>3</sup>: Average daily food consumption [g/kgbw/day]

<sup>4</sup>: Median of consumed food

<sup>5</sup>: Standard deviation of consumed food

<sup>6</sup>: Relative standard deviation of daily food consumption

**Table S3.** Summary of consumption survey 2018-2020.

| Age [year]                       | 1-2   | 2-3   | 3-9   | 9-18  | 18-64 | 64-74 |
|----------------------------------|-------|-------|-------|-------|-------|-------|
| No of subjects                   | 536   | 516   | 939   | 1159  | 977   | 1070  |
| Ave bw [kg]                      | 11.07 | 13.62 | 17.57 | 50.50 | 79.55 | 81.50 |
| <b>Apples</b>                    |       |       |       |       |       |       |
| Consum [day]                     | 241   | 244   | 431   | 395   | 314   | 457   |
| LP [kg]                          | 0.322 | 0.324 | 0.466 | 0.733 | 0.480 | 0.524 |
| Max <sup>1</sup>                 | 63.83 | 55.75 | 46.00 | 32.86 | 10.34 | 16.02 |
| P97.5 <sup>2</sup>               | 29.13 | 23.81 | 26.50 | 14.52 | 6.03  | 6.43  |
| Average <sup>3</sup>             | 9.71  | 8.40  | 7.10  | 3.92  | 2.23  | 2.56  |
| Median <sup>4</sup>              | 7.69  | 6.90  | 5.77  | 2.94  | 1.94  | 2.14  |
| SD <sup>5</sup>                  | 8.72  | 6.66  | 6.34  | 4.01  | 1.52  | 1.64  |
| CV <sup>6</sup>                  | 0.90  | 0.79  | 0.89  | 1.02  | 0.68  | 0.64  |
| <b>Cherries</b>                  |       |       |       |       |       |       |
| Consum [day]                     | 9     | 1     | 17    | 20    | 25    | 19    |
| LP [kg]                          | 0.170 | 0.084 | 0.251 | 0.170 | 0.435 | 0.229 |
| Max <sup>1</sup>                 | 15.38 | 6.15  | 14.29 | 3.38  | 5.47  | 2.82  |
| P97.5 <sup>2</sup>               | NA    | NA    | NA    | NA    | NA    | NA    |
| Average <sup>3</sup>             | 6.64  |       | 3.37  | 1.38  | 1.45  | 0.98  |
| Median <sup>4</sup>              | 6.96  |       | 2.67  | 1.00  | 0.91  | 0.63  |
| SD <sup>5</sup>                  | 4.35  |       | 3.31  | 1.03  | 1.47  | 0.87  |
| CV <sup>6</sup>                  | 0.66  |       | 0.98  | 0.75  | 1.02  | 0.89  |
| <b>Grape fresh+fresh pressed</b> |       |       |       |       |       |       |
| Consum [day]                     | 18    | 16    | 38    | 64    | 66    | 48    |
| LP [kg]                          | 0.326 | 0.486 | 0.230 | 0.500 | 0.374 | 0.609 |
| Max <sup>1</sup>                 | 29.41 | 35.71 | 25.00 | 20.80 | 5.56  | 9.26  |
| P97.5 <sup>2</sup>               | NA    | NA    | 13.11 | 9.91  | 4.70  | 7.49  |
| Average <sup>3</sup>             | 12.94 | 12.82 | 5.64  | 3.36  | 4.62  | 2.37  |

|                                    |       |       |       |       |       |       |
|------------------------------------|-------|-------|-------|-------|-------|-------|
| Median <sup>4</sup>                | 11.60 | 10.71 | 4.46  | 2.61  | 1.54  | 1.60  |
| SD <sup>5</sup>                    | 7.91  | 9.67  | 4.48  | 3.22  | 1.25  | 2.23  |
| CV <sup>6</sup>                    | 0.61  | 0.75  | 0.79  | 0.96  | 0.27  | 0.94  |
| <b>Peaches</b>                     |       |       |       |       |       |       |
| Consum [day]                       | 11    | 10    | 28    | 26    | 30    | 46    |
| LP [kg]                            | 0.18  | 0.21  | 0.38  | 0.42  | 0.58  | 0.87  |
| Max <sup>1</sup>                   | 16.00 | 15.38 | 21.43 | 9.29  | 7.46  | 14.38 |
| P97.5 <sup>2</sup>                 |       |       | 17.14 | 8.39  | 7.29  | 10.66 |
| Average <sup>3</sup>               | 8.45  | 7.08  | 6.51  | 3.55  | 3.69  | 2.95  |
| Median <sup>4</sup>                | 9.09  | 6.67  | 5.66  | 3.13  | 2.07  | 2.61  |
| SD <sup>5</sup>                    | 5.39  | 5.31  | 4.48  | 2.15  | 1.94  | 2.08  |
| CV <sup>6</sup>                    | 0.64  | 0.75  | 0.69  | 0.61  | 0.53  | 0.71  |
| <b>Peppers</b>                     |       |       |       |       |       |       |
| Consum [day]                       | 2     | 3     | 10    | 19    | 28    | 23    |
| LP [kg]                            | 0.02  | 0.03  | 0.09  | 0.12  | 0.12  | 0.18  |
| Max <sup>1</sup>                   | 1.67  | 2.14  | 3.94  | 2.49  | 1.52  | 2.22  |
| P97.5 <sup>2</sup>                 | NA    | NA    | NA    | NA    | NA    | NA    |
| Average <sup>3</sup>               | 1.24  | 1.84  | 1.74  | 1.10  | 0.68  | 0.67  |
| Median <sup>4</sup>                | 1.24  | 2.00  | 1.58  | 1.00  | 0.59  | 0.60  |
| SD <sup>5</sup>                    | 0.60  | 0.41  | 0.88  | 0.72  | 0.35  | 0.48  |
| CV <sup>6</sup>                    | 0.48  | 0.22  | 0.51  | 0.65  | 0.52  | 0.72  |
| <b>Strawberry fresh and frozen</b> |       |       |       |       |       |       |
| Consum [day]                       | 15    | 14    | 9     | 26    | 28    | 33    |
| LP [kg]                            | 0.211 | 1.090 | 0.413 | 0.337 | 0.545 | 0.323 |
| Max <sup>1</sup>                   | 19.09 | 80.00 | 23.53 | 6.67  | 6.85  | 6.00  |
| P97.5 <sup>2</sup>                 | NA    | NA    | NA    | NA    | NA    | 3.98  |
| Average <sup>3</sup>               | 7.25  | 11.04 | 4.39  | 1.59  | 1.72  | 1.31  |
| Median <sup>4</sup>                | 5.80  | 3.07  | 1.15  | 0.84  | 1.34  | 0.87  |

|                 |      |       |      |      |      |      |
|-----------------|------|-------|------|------|------|------|
| SD <sup>5</sup> | 5.15 | 20.68 | 7.50 | 1.83 | 1.33 | 1.25 |
| CV <sup>6</sup> | 0.71 | 1.87  | 1.71 | 1.15 | 0.78 | 0.96 |

Notes:

<sup>1</sup>: Maximum amount consumed [g/kgbw/day]

<sup>2</sup>: 97.5th percentile consumption [g/kgbw/day]

<sup>3</sup>: Average of daily food consumption [g/kgbw/day]

<sup>4</sup>: Median of consumed food

<sup>5</sup>: Standard deviation of consumed food

<sup>6</sup>: Relative standard deviation of daily food consumption

**Table S4.** Summary of residues, their MRLs and ARfD values detected in the selected samples during 2017-2021.

| Active substance    | ARfD   | Apples |      |       |                    | Cherries |      |       |                    | Grapes |      |       |                    | Peaches |      |       |                    | Peppers |      |       |                    | Strawberries |      |       |                    |
|---------------------|--------|--------|------|-------|--------------------|----------|------|-------|--------------------|--------|------|-------|--------------------|---------|------|-------|--------------------|---------|------|-------|--------------------|--------------|------|-------|--------------------|
|                     |        | No     | MRL  | Max   | P <sub>0.975</sub> | No       | MRL  | Max   | P <sub>0.975</sub> | No     | MRL  | Max   | P <sub>0.975</sub> | No      | MRL  | Max   | P <sub>0.975</sub> | No      | MRL  | Max   | P <sub>0.975</sub> | No           | MRL  | Max   | P <sub>0.975</sub> |
| Abamectin (sum)     | 0.0012 |        |      |       |                    |          |      |       |                    |        |      |       |                    |         |      |       |                    |         |      |       |                    | 4            | 0.15 | 0.075 |                    |
| Acetamiprid         | 0.025  | 162    | 0.4  | 0.16  | 0.14               | 27       | 1.5  | 0.13  |                    | 36     | 0.5  | 0.39  |                    | 40      | 0.2  | 0.14  |                    | 39      | 0.3  | 0.3   |                    | 3            | 0.5  | 0.076 |                    |
| Ametoctradin        | NA     |        |      |       |                    |          |      |       |                    | 4      | 6.0  | 0.13  |                    |         |      |       |                    |         |      |       |                    |              |      |       |                    |
| Azoxystrobin        | NA     |        |      |       |                    |          |      |       |                    | 27     | 3.0  | 0.44  |                    | 1       | 2.0  | 0.9   |                    | 65      | 3.0  | 0.31  | 0.29               | 50           | 10   | 0.33  | 0.32               |
| Bifenazate          | 0.1    |        |      |       |                    |          |      |       |                    |        |      |       |                    |         |      |       |                    |         |      |       |                    | 3            | 3    | 0.38  |                    |
| Boscalid            | NA     | 162    | 0.31 | 2.00  | 0.23               | 19       | 5.0  | 0.2   |                    | 87     | 5.0  | 0.75  | 0.70               | 29      | 5.0  | 0.15  |                    | 35      | 3.0  | 0.32  |                    | 70           | 6    | 1.2   | 0.82               |
| Bupirimate          | NA     | 3      | 0.3  | 0.02  |                    |          |      |       |                    | 2      | 1.5  | 0.041 |                    | 2       | 0.3  | 0.041 |                    |         |      |       |                    | 14           | 1.5  | 0.92  |                    |
| Buprofezin          | 0.5    |        |      |       |                    |          |      |       |                    | 8      | 0.01 | 0.066 |                    |         |      |       |                    | 2       | 0.01 | 0.236 |                    |              |      |       |                    |
| Captan              | 0.3    | 118    | -    | 2.68  | 1.57               |          |      |       |                    |        |      |       |                    |         |      |       |                    |         |      |       |                    |              |      |       |                    |
| Captan and THPI     |        | 160    | 10   | 88.61 | 40.2               | 6        | 6.0  | 0.22  |                    |        |      |       |                    | 12      | 6.0  | 0.7   |                    | 1       | 0.03 | 0.061 |                    | 7            | 1.5  | 0.16  |                    |
| Carbendazim         | 0.02   | 27     | 3    | 0.10  |                    | 25       | 0.5  | 0.22  |                    | 12     | 0.3  | 0.21  |                    | 10      | 0.2  | 0.2   |                    |         |      |       |                    | 6            | 0.1  | 0.1   |                    |
| Chlorantraniliprole | NA     | 100    | 0.4  | 0.10  | 0.07               |          |      |       |                    | 12     | 1.0  | 0.21  |                    | 1       | 1.0  | 0.016 |                    | 17      | 1.0  | 0.068 |                    |              |      |       |                    |
| Chlorothalonil      | 0.05   | 3      | 0.01 | 0.04  |                    |          |      |       |                    | 1      | 0.01 | 0.017 |                    |         |      |       |                    |         |      |       |                    |              |      |       |                    |
| Chlorpyrifos        | 0.1    | 8      | 0.01 | 0.05  |                    | 1        | 0.01 | 0.014 |                    | 2      | 0.01 | 0.057 |                    | 3       | 0.01 | 0.91  |                    |         |      |       |                    |              |      |       |                    |
| Chlorpyrifos-methyl | 0.005  | 13     | 0.01 | 0.06  |                    |          |      |       |                    | 5      | 0.01 | 0.073 |                    | 2       | 0.01 | 0.023 |                    | 5       | 0.01 | 0.058 |                    |              |      |       |                    |
| Clofentezine        | NA     |        |      |       |                    |          |      |       |                    |        |      |       |                    |         |      |       |                    |         |      |       |                    | 1            | 2    | 0.098 |                    |
| Clothianidin        | 0.1    | 1      | 0.4  | 0.01  |                    |          |      |       |                    | 4      | 0.7  | 0.03  |                    |         |      |       |                    | 4       | 0.04 | 0.032 |                    | 1            | 0.02 | 0.009 |                    |
| Cyantraniliprole    | NA     | 1      | 0.8  | 0.02  |                    |          |      |       |                    |        |      |       |                    |         |      |       |                    |         |      |       |                    |              |      |       |                    |
| Cyazofamid          | NA     |        |      |       |                    |          |      |       |                    | 22     | 2.0  | 0.2   |                    |         |      |       |                    |         |      |       |                    |              |      |       |                    |
| Cyflufenamid (sum)  | 0.05   |        |      |       |                    |          |      |       |                    |        |      |       |                    |         |      |       |                    | 5       | 0.06 | 0.019 |                    | 2            | 0.04 | 0.013 |                    |
| Cypermethrin (sum)  | 0.005  | 6      | 0.7  | 0.05  |                    |          |      |       |                    | 5      | 0.5  | 0.084 |                    | 1       | 2.0  | 0.48  |                    | 5       | 0.5  | 0.125 |                    |              |      |       |                    |
| Cyproconazole       | 0.02   |        |      |       |                    |          |      |       |                    | 2      | 0.2  | 0.014 |                    | 2       | 0.1  | 0.01  |                    |         |      |       |                    |              |      |       |                    |
| Cyprodinil          | NA     | 19     | 2    | 0.13  |                    |          |      |       |                    | 59     | 3.0  | 1.5   | 1.13               | 14      | 2.0  | 0.19  |                    | 3       | 1.5  | 0.048 |                    | 39           | 5    | 1.8   |                    |
| Deltamethrin        | 0.01   | 1      | 0.2  | 0.01  |                    | 4        | 0.1  | 0.079 |                    | 1      | 0.2  | 0.16  |                    | 4       | 0.15 | 0.038 |                    | 2       | 0.2  | 0.029 |                    | 2            | 0.2  | 0.092 |                    |
| Difenoconazole      | 0.16   | 42     | 0.8  | 0.73  |                    | 1        | 0.3  |       |                    | 19     | 3.0  | 1.38  |                    | 13      | 0.5  | 0.042 |                    | 62      | 0.9  | 0.38  | 0.29               | 49           | 2    | 0.25  | 0.24               |
| Diflubenzuron       | NA     |        |      |       |                    |          |      |       |                    | 1      | 0.01 | 0.054 |                    | 5       | 0.01 | 0.24  |                    |         |      |       |                    |              |      |       |                    |



| Active substance    | ARfD  | Apples |      |      |                    | Cherries |      |       |                    | Grapes |       |       |                    | Peaches |      |       |                    | Peppers |     |       |                    | Strawberries |      |       |                    |
|---------------------|-------|--------|------|------|--------------------|----------|------|-------|--------------------|--------|-------|-------|--------------------|---------|------|-------|--------------------|---------|-----|-------|--------------------|--------------|------|-------|--------------------|
|                     |       | No     | MRL  | Max  | P <sub>0.975</sub> | No       | MRL  | Max   | P <sub>0.975</sub> | No     | MRL   | Max   | P <sub>0.975</sub> | No      | MRL  | Max   | P <sub>0.975</sub> | No      | MRL | Max   | P <sub>0.975</sub> | No           | MRL  | Max   | P <sub>0.975</sub> |
| Dimethoate          |       |        |      |      |                    | 1        | 0.01 | 0.052 |                    | 1      | 0.01  | 0.017 |                    |         |      |       |                    |         |     |       |                    |              |      |       |                    |
| Dimethomorph        | 0.6   |        |      |      |                    |          |      |       |                    | 54     | 3.0   | 1.7   | 1.48               |         |      |       |                    |         |     |       |                    | 2            | 0.7  | 0.045 |                    |
| Dithianon           | 0.12  | 23     | 3    | 0.2  |                    |          |      |       |                    |        |       |       |                    |         |      |       |                    |         |     |       |                    |              |      |       |                    |
| Dithiocarbamates    |       |        |      |      |                    | 23       | 2.0  | 0.94  |                    | 71     | 5.0   | 2.9   | 1.59               | 31      | 2.0  | 0.73  |                    | 18      | 5.0 | 2.9   |                    | 10           | 10   | 0.47  |                    |
| Dodine              | 0.1   |        |      |      |                    | 2        | 3.0  | 0.029 |                    |        |       |       |                    |         |      |       |                    |         |     |       |                    |              |      |       |                    |
| Emamectin           | 0.01  |        |      |      |                    |          |      |       |                    |        |       |       |                    | 1       | 0.15 | 0.018 |                    |         |     |       |                    | 1            | 0.05 | 0.012 |                    |
| Ethirimol           |       |        |      |      |                    |          |      |       |                    | 1      | 0.4   | 0.034 |                    |         |      |       |                    |         |     |       |                    | 8            | 0.3  | 0.058 |                    |
| Etofenprox          | 1.0   | 28     | 0.7  | 0.19 | 0.17               |          |      |       |                    | 2      | 4.0   | 0.293 |                    | 13      | 0.6  | 0.14  |                    |         |     |       |                    |              |      |       |                    |
| Etoxazole           | NA    | 1      | 0.07 | 0.02 |                    |          |      |       |                    |        |       |       |                    |         |      |       |                    |         |     |       |                    | 3            | 0.2  | 0.044 |                    |
| Famoxadone          | 0.1   |        |      |      |                    |          |      |       |                    | 7      | 2.0   | 0.15  |                    |         |      |       |                    |         |     |       |                    |              |      |       |                    |
| Fenbuconazole       | 0.3   |        |      |      |                    |          |      |       |                    |        |       |       |                    | 9       | 0.6  | 0.107 |                    |         |     |       |                    |              |      |       |                    |
| Fenhexamid          | NA    | 1      | 0.01 | 0.01 |                    | 12       | 7.0  | 0.43  |                    | 56     | 15.0  | 4.2   | 3.04               |         |      |       |                    | 6       | 3.0 | 0.31  |                    | 30           | 10   | 1.1   |                    |
| Fenoxycarb          | 2.0   | 5      | 0.7  | 0.03 |                    |          |      |       |                    |        |       |       |                    | 2       | 1.5  | 0.028 |                    |         |     |       |                    |              |      |       |                    |
| Fenpyrazamine       | 0.3   |        |      |      |                    |          |      |       |                    | 2      | 3.0   | 0.242 |                    | 2       | 5.0  | 0.028 |                    | 4       | 3.0 | 0.038 |                    |              |      |       |                    |
| Fenpyroximate       | 0.02  | 13     | 0.3  | 0.03 |                    |          |      |       |                    |        |       |       |                    | 1       | 0.3  | 0.01  |                    |         |     |       |                    |              |      |       |                    |
| Fenvalerate (Sum)   |       | 2      | 0.1  | 0.03 |                    |          |      |       |                    | 1      | 0.3   | 0.01  |                    | 6       | 0.2  | 0.074 |                    |         |     |       |                    |              |      |       |                    |
| Flonicamid          | 0.025 | 29     | 0.3  | 0.03 |                    |          |      |       |                    |        |       |       |                    |         |      |       |                    |         |     |       |                    |              |      |       |                    |
| Flonicamid (Sum)    |       | 56     | 0.3  | 81.2 | 74.3               |          |      |       |                    |        |       |       |                    | 11      | 0.4  | 0.17  |                    | 25      | 0.3 | 0.3   |                    | 1            | 0.7  | 0.32  |                    |
| Fluazinam           | 0.07  | 2      | 0.3  | 0.03 |                    |          |      |       |                    |        |       |       |                    |         |      |       |                    |         |     |       |                    |              |      |       |                    |
| Fludioxonil         | NA    | 58     | 5    | 0.41 | 0.29               | 2        | 5.0  | 0.066 |                    | 51     | 5.0   | 1.6   | 1.23               | 56      | 10.0 | 2.7   | 2.10               | 9       | 1.0 | 0.063 |                    | 28           | 4    | 0.68  |                    |
| Fluopicolide        | 0.18  |        |      |      |                    |          |      |       |                    | 8      | 2.0   | 0.079 |                    |         |      |       |                    | 1       | 1.0 | 0.024 |                    |              |      |       |                    |
| Fluopyram           | 0.5   | 88     | 0.8  | 0.27 | 0.20               | 15       | 2.0  | 0.19  |                    | 44     | 2.0   | 0.4   | 0.39               | 54      | 1.5  | 0.25  | 0.19               | 39      | 2.0 | 0.198 |                    | 34           | 2    | 0.266 |                    |
| Flupyradifurone     | 0.15  | 4      | 0.6  | 0.03 |                    |          |      |       |                    |        |       |       |                    |         |      |       |                    |         |     |       |                    |              |      |       |                    |
| Flutriafol          | 0.05  |        |      |      |                    |          |      |       |                    |        |       |       |                    |         |      |       |                    | 18      | 1.0 | 0.226 |                    | 1            | 1.5  | 0.01  |                    |
| Fluvalinate         |       | 1      | 0.3  | 0.02 |                    |          |      |       |                    |        |       |       |                    |         |      |       |                    |         |     |       |                    |              |      |       |                    |
| Fluxapyroxad        | 0.25  | 26     | 0.9  | 0.08 |                    |          |      |       |                    | 22     | 3.0   | 0.78  |                    |         |      |       |                    | 1       | 0.6 | 0.012 |                    |              |      |       |                    |
| Folpet              | 0.2   | 8      | 0.3  | 0.1  |                    |          |      |       |                    |        |       |       |                    |         |      |       |                    |         |     |       |                    |              |      |       |                    |
| Folpet <sup>2</sup> | 0.2   |        |      |      |                    |          |      |       |                    | 3      | 6.0   | 0.8   |                    |         |      |       |                    |         |     |       |                    | 1            | 5    | 0.026 |                    |
| Formetanate (sum)   | 0.005 |        |      |      |                    |          |      |       |                    |        |       |       |                    |         |      |       |                    |         |     |       |                    | 1            | 0.4  | 0.019 |                    |
| Fosetyl-Al          | NA    |        |      |      |                    |          |      |       |                    | 3      | 100.0 | 4.2   |                    |         |      |       |                    |         |     |       |                    |              |      |       |                    |
| Glyphosate          | 0.5   |        |      |      |                    |          |      |       |                    |        |       |       |                    |         |      |       |                    | 1       | 0.1 | 0.096 |                    |              |      |       |                    |

| Active substance   | ARfD   | Apples |      |      |                    | Cherries |      |       |                    | Grapes |      |       |                    | Peaches |      |       |                    | Peppers |      |       |                    | Strawberries |      |       |                    |
|--------------------|--------|--------|------|------|--------------------|----------|------|-------|--------------------|--------|------|-------|--------------------|---------|------|-------|--------------------|---------|------|-------|--------------------|--------------|------|-------|--------------------|
|                    |        | No     | MRL  | Max  | P <sub>0.975</sub> | No       | MRL  | Max   | P <sub>0.975</sub> | No     | MRL  | Max   | P <sub>0.975</sub> | No      | MRL  | Max   | P <sub>0.975</sub> | No      | MRL  | Max   | P <sub>0.975</sub> | No           | MRL  | Max   | P <sub>0.975</sub> |
| Glufosinate (sum)  | 0.021  |        |      |      |                    |          |      |       |                    |        |      |       |                    |         |      |       |                    | 1       | 0.03 | 0.05  |                    |              |      |       |                    |
| Hexythiazox        | NA     | 2      | 0.4  | 0.01 |                    |          |      |       |                    | 1      | 1.0  | 0.02  |                    |         |      |       |                    | 3       | 0.09 | 0.019 |                    | 7            | 6    | 0.04  |                    |
| Imazalil           | 0.05   |        |      |      |                    |          |      |       |                    |        |      |       |                    | 1       | 0.01 | 0.011 |                    |         |      |       |                    |              |      |       |                    |
| Imidacloprid       | 0.08   | 1      | 0.01 | 0.01 |                    |          |      |       |                    | 16     | 0.7  | 0.2   |                    | 9       | 0.01 | 0.041 |                    | 23      | 0.9  | 0.8   |                    | 2            | 0.01 | 0.023 |                    |
| Indoxacarb         | 0.005  | 61     | 0.5  | 0.10 | 0.09               | 1        | 1.0  | 0.014 |                    | 6      | 2.0  | 0.087 |                    | 16      | 1.0  | 0.064 |                    | 13      | 0.3  | 0.118 |                    |              |      |       |                    |
| Iprodione          | 0.06   |        |      |      |                    |          |      |       |                    | 6      | 0.01 | 1.3   |                    |         |      |       |                    | 2       | 0.01 | 1.84  |                    | 2            | 0.01 | 0.51  |                    |
| Iprovalicarb       | NA     |        |      |      |                    |          |      |       |                    | 4      | 2.0  | 0.044 |                    |         |      |       |                    |         |      |       |                    |              |      |       |                    |
| Kresoxim-methyl    | NA     |        |      |      |                    |          |      |       |                    |        |      |       |                    |         |      |       |                    | 2       | 0.8  | 0.04  |                    | 1            | 1.5  | 0.014 |                    |
| Lambda-Cyhalothrin | 0.0025 | 21     | 0.08 | 0.05 |                    | 35       | 0.3  | 0.15  |                    | 16     | 0.08 | 0.053 |                    | 39      | 0.15 | 0.089 |                    | 21      | 0.1  | 0.1   |                    | 4            | 0.2  | 0.013 |                    |
| Lufenuron          | NA     |        |      |      |                    |          |      |       |                    |        |      |       |                    |         |      |       |                    | 1       | 0.8  | 0.015 |                    |              |      |       |                    |
| Mandipropamid      | NA     |        |      |      |                    |          |      |       |                    | 16     | 2.0  | 0.24  |                    |         |      |       |                    |         |      |       |                    |              |      |       |                    |
| Mepanipyrim        | 0.3    |        |      |      |                    |          |      |       |                    |        |      |       |                    |         |      |       |                    |         |      |       |                    | 1            | 3    | 0.063 |                    |
| Metalaxyl +M       | 0.5    |        |      |      |                    |          |      |       |                    | 20     | 2.0  | 0.1   |                    |         |      |       |                    | 1       | 0.5  | 0.014 |                    |              |      |       |                    |
| Metaflumizone      | 0.13   |        |      |      |                    |          |      |       |                    |        |      |       |                    |         |      |       |                    | 2       | 1.5  | 0.15  |                    |              |      |       |                    |
| Methomyl           | 0.0025 |        |      |      |                    |          |      |       |                    |        |      |       |                    |         |      |       |                    | 3       | 0.04 | 0.11  |                    |              |      |       |                    |
| Methoxyfenozide    | 0.1    | 83     | 0.01 | 0.16 | 0.14               |          |      |       |                    | 30     | 1.0  | 0.27  |                    |         |      |       |                    | 7       | 2.0  | 0.082 |                    |              |      |       |                    |
| Metrafenone        | NA     | 1      | 1    | 0.05 |                    |          |      |       |                    | 34     | 7.0  | 1.187 |                    |         |      |       |                    | 12      | 2.0  | 0.28  |                    | 1            | 0.6  | 0.032 |                    |
| Myclobutanil       | 0.31   | 8      | 0.6  | 0.03 |                    | 1        | 3.0  | 0.023 |                    | 16     | 1.5  | 0.066 |                    | 2       | 3.0  | 0.03  |                    | 2       | 3.0  | 0.17  |                    | 19           | 1.5  | 0.41  |                    |
| Napropamide        | NA     |        |      |      |                    |          |      |       |                    |        |      |       |                    |         |      |       |                    | 20      | 0.01 | 0.17  |                    |              |      |       |                    |
| Omethoate          |        |        |      |      |                    | 1        | 0.01 | 0.101 |                    |        |      |       |                    |         |      |       |                    |         |      |       |                    |              |      |       |                    |
| Penconazole        | 0.5    | 3      | 0.15 | 0.01 |                    | 2        | 0.15 | 0.014 |                    | 37     | 0.5  | 0.14  |                    | 6       | 0.15 | 0.061 |                    | 3       | 0.2  | 0.053 |                    | 23           | 0.5  | 0.16  |                    |
| Phosmet            | 0.001  | 1      | 10   | 0.02 |                    |          |      |       |                    |        |      |       |                    | 5       | 1.0  | 0.212 |                    |         |      |       |                    |              |      |       |                    |
| Phthalimide        |        | 4      | -    | 0.1  |                    |          |      |       |                    |        |      |       |                    |         |      |       |                    |         |      |       |                    |              |      |       |                    |
| Pirimicarb         | 0.1    | 107    | 0.5  | 0.28 | 0.11               | 7        | 5.0  | 0.48  |                    | 1      | 0.01 | 0.01  |                    | 13      | 1.5  | 0.17  |                    |         |      |       |                    |              |      |       |                    |
| Prochloraz         | 0.025  |        |      |      |                    | 2        | 0.03 | 0.036 |                    |        |      |       |                    |         |      |       |                    |         |      |       |                    |              |      |       |                    |
| Propamocarb (sum)  | 1.0    |        |      |      |                    |          |      |       |                    |        |      |       |                    | 1       | 0.01 | 0.01  |                    | 6       | 3.0  | 0.24  |                    | 3            | 0.01 | 0.064 |                    |
| Proquinazid        | 0.2    |        |      |      |                    |          |      |       |                    | 2      | 0.5  | 0.074 |                    |         |      |       |                    |         |      |       |                    |              |      |       |                    |
| Pymetrozine        | 0.1    |        |      |      |                    |          |      |       |                    |        |      |       |                    |         |      |       |                    | 6       | 0.02 | 0.054 |                    | 1            | 0.02 | 0.073 |                    |
| Pyraclostrobin     | 0.03   | 117    | 0.6  | 0.10 | 0.84               | 5        | 3.0  | 0.031 |                    | 18     | 0.3  | 0.303 |                    | 14      | 0.3  | 0.033 |                    | 15      | 0.5  | 0.066 |                    | 43           | 1.5  | 0.14  | 0.14               |
| Pyridaben          | 0.05   |        |      |      |                    |          |      |       |                    |        |      |       |                    |         |      |       |                    | 6       | 0.3  | 0.019 |                    |              |      |       |                    |

| Active substance      | ARfD | Apples |     |       |                    | Cherries |     |       |                    | Grapes |     |       |                    | Peaches |      |       |                    | Peppers |      |       |                    | Strawberries |      |       |                    |
|-----------------------|------|--------|-----|-------|--------------------|----------|-----|-------|--------------------|--------|-----|-------|--------------------|---------|------|-------|--------------------|---------|------|-------|--------------------|--------------|------|-------|--------------------|
|                       |      | No     | MRL | Max   | P <sup>0.975</sup> | No       | MRL | Max   | P <sup>0.975</sup> | No     | MRL | Max   | P <sup>0.975</sup> | No      | MRL  | Max   | P <sup>0.975</sup> | No      | MRL  | Max   | P <sup>0.975</sup> | No           | MRL  | Max   | P <sup>0.975</sup> |
| Pyridalyl             | NA   |        |     |       |                    |          |     |       |                    |        |     |       |                    |         |      |       |                    | 1       | 0.9  | 0.13  |                    |              |      |       |                    |
| Pyrimethanil          | NA   | 57     | 15  | 1.35  | 1.20               |          |     |       |                    | 26     | 5.0 | 1.294 |                    | 3       | 10.0 | 0.739 |                    | 1       | 2.0  | 0.012 |                    | 7            | 5    | 1.3   |                    |
| Pyriofenone           | NA   |        |     |       |                    |          |     |       |                    | 2      | 0.9 | 0.17  |                    |         |      |       |                    |         |      |       |                    |              |      |       |                    |
| Pyriproxyfen          | 1.0  | 3      | 0.2 | 0.03  |                    |          |     |       |                    |        |     |       |                    |         |      |       |                    | 8       | 1.0  | 0.105 |                    |              |      |       |                    |
| Quinoxifen            | NA   |        |     |       |                    |          |     |       |                    | 10     | 1.0 | 0.091 |                    |         |      |       |                    |         |      |       |                    |              |      |       |                    |
| Spinetoram (sum)      | 0.1  |        |     |       |                    |          |     |       |                    |        |     |       |                    |         |      |       |                    |         |      |       |                    | 2            | 0.2  | 0.041 |                    |
| Spinosad (sum)        | NA   |        |     |       |                    |          |     |       |                    | 10     | 0.5 | 0.091 |                    | 3       | 0.6  | 0.12  |                    | 6       | 0.6  | 0.24  |                    | 11           | 0.3  | 0.12  |                    |
| Spirodiclofen         | NA   | 48     | 0.8 | 0.80  | 0.55               |          |     |       |                    |        |     |       |                    | 1       | 2.0  | 0.014 |                    | 1       | 0.2  | 0.12  |                    |              |      |       |                    |
| Spiromesifen          | 2.0  |        |     |       |                    |          |     |       |                    |        |     |       |                    |         |      |       |                    | 20      | 0.5  | 0.37  |                    | 8            | 1.0  | 0.18  |                    |
| Spirotetramat         | 1.0  | 5      | 0.7 | 14.85 |                    |          |     |       |                    | 10     | 2.0 | 0.11  |                    |         |      |       |                    | 21      | 1.0  | 0.69  |                    |              |      |       |                    |
| Spiroxamine           | 0.1  |        |     |       |                    |          |     |       |                    | 16     | 0.6 | 0.17  |                    |         |      |       |                    |         |      |       |                    |              |      |       |                    |
| Sulfoxaflor           | 0.25 |        |     |       |                    |          |     |       |                    | 1      | 2.0 | 0.048 |                    |         |      |       |                    |         |      |       |                    |              |      |       |                    |
| Tau-fluvalinate       |      | 9      | 0.3 | 0.17  |                    |          |     |       |                    | 6      | -   | 0.075 |                    |         |      |       |                    |         |      |       |                    |              |      |       |                    |
| Tebuconazole          | 0.03 | 131    | 0.3 | 0.25  | 0.16               | 24       | 1.0 | 0.2   |                    | 28     | 0.5 | 0.3   |                    | 72      | 0.6  | 0.276 | 0.22               | 4       | 0.6  | 0.47  |                    | 6            | 0.02 | 0.2   |                    |
| Tebufenpyrad          | 0.02 | 11     | 0.3 | 0.06  |                    |          |     |       |                    |        |     |       |                    |         |      |       |                    |         |      |       |                    | 8            | 1    | 0.18  |                    |
| Tetrahidrophthalimide |      | 116    | -   | 0.84  | 0.75               |          |     |       |                    |        |     |       |                    |         |      |       |                    |         |      |       |                    |              |      |       |                    |
| Tetraconazole         | 0.05 | 30     | 0.3 | 0.07  |                    |          |     |       |                    | 4      | 0.5 | 0.15  |                    |         |      |       |                    |         |      |       |                    |              |      |       |                    |
| TFNA                  |      | 94     | -   | 0.08  | 0.06               |          |     |       |                    |        |     |       |                    |         |      |       |                    |         |      |       |                    |              |      |       |                    |
| Thiacloprid           | 0.02 | 54     | 0.3 | 0.23  | 0.17               | 3        | 0.5 | 0.014 |                    |        |     |       |                    | 6       | 0.5  | 0.08  |                    | 3       | 1.0  | 0.057 |                    | 19           | 1    | 0.44  |                    |
| Thiamethoxam          | 0.5  | 18     | 0.3 | 0.05  |                    | 6        | 0.6 | 0.34  |                    | 10     | 0.4 | 0.051 |                    |         |      |       |                    | 17      | 0.7  | 0.13  |                    | 6            | 0.3  | 0.11  |                    |
| Thiophanate-methyl    | 0.02 | 3      | 0.5 | 0.04  |                    | 5        | 0.3 | 0.121 |                    | 5      | 0.1 | 0.071 |                    | 4       | 2.0  | 0.029 |                    | 1       | 0.1  | 0.023 |                    | 2            | 0.1  | 0.1   |                    |
| Triadimefon           | 0.08 |        |     |       |                    |          |     |       |                    |        |     |       |                    |         |      |       |                    | 2       | 0.01 | 0.09  |                    |              |      |       |                    |
| Triadimenol           | 0.05 |        |     |       |                    |          |     |       |                    |        |     |       |                    |         |      |       |                    | 10      | 0.5  | 0.093 |                    | 1            | 0.5  | 0.013 |                    |
| Trifloxystrobin       | 0.5  | 11     | 0.7 | 0.02  |                    | 5        | 3.0 | 0.058 |                    | 5      | 3.0 | 0.034 |                    | 1       | 3.0  | 0.011 |                    | 20      | 0.4  | 0.17  |                    | 36           | 1    | 0.31  |                    |
| Triflumuron           | NA   | 59     | 0.5 | 0.16  | 0.12               |          |     |       |                    |        |     |       |                    |         |      |       |                    |         |      |       |                    |              |      |       |                    |
| Zoxamide              | NA   |        |     |       |                    |          |     |       |                    | 10     | 5.0 | 1.8   |                    |         |      |       |                    |         |      |       |                    |              |      |       |                    |

Notes:

No: number of samples analysed; NA: ARfD: mg/kgbw/day; Not applicable; NAP: not approved; Empty cell: value is not included in the EC list.

<sup>2</sup>: Sum of folpet and phthalimide, expressed as folpet.
